# Supplementary material for: In silico prediction, molecular docking and simulation of antiviral compounds against major proteins of Nipah virus
Source: Research Square preprint supplement (doi:10.21203/rs.3.rs-6263781/v1), 2025-03-25

**In silico prediction, molecular docking and simulation of antiviral compounds against major proteins of Nipah virus**

Nadim Sharif 1*#, Hasan Huzayfa Rahaman1#, Rista Majumder2,Nazmul Sharif3, Perla Araceli Arroyo Gala4,5,6, Thania Candelaria Chio Montero5,7, Fuad M. Alzahrani8, Khalaf F. Alsharif8, Khalid J. Alzahrani8, Isabel De la Torre Díez9, Shuvra Kanti Dey1*

**Supplementary Figure 1.** Predited proteins structures and their stability bythe ERRAT2 and ProSA. The first column provided the predicted structures, and ERRAT overall quality scores, the second column provided the Z-scores and the third column provided the plot of residue scores. Part A, D, G for NiV-G, Part B, E, H for NiV-F, and Part C, F, I for NiV-M.


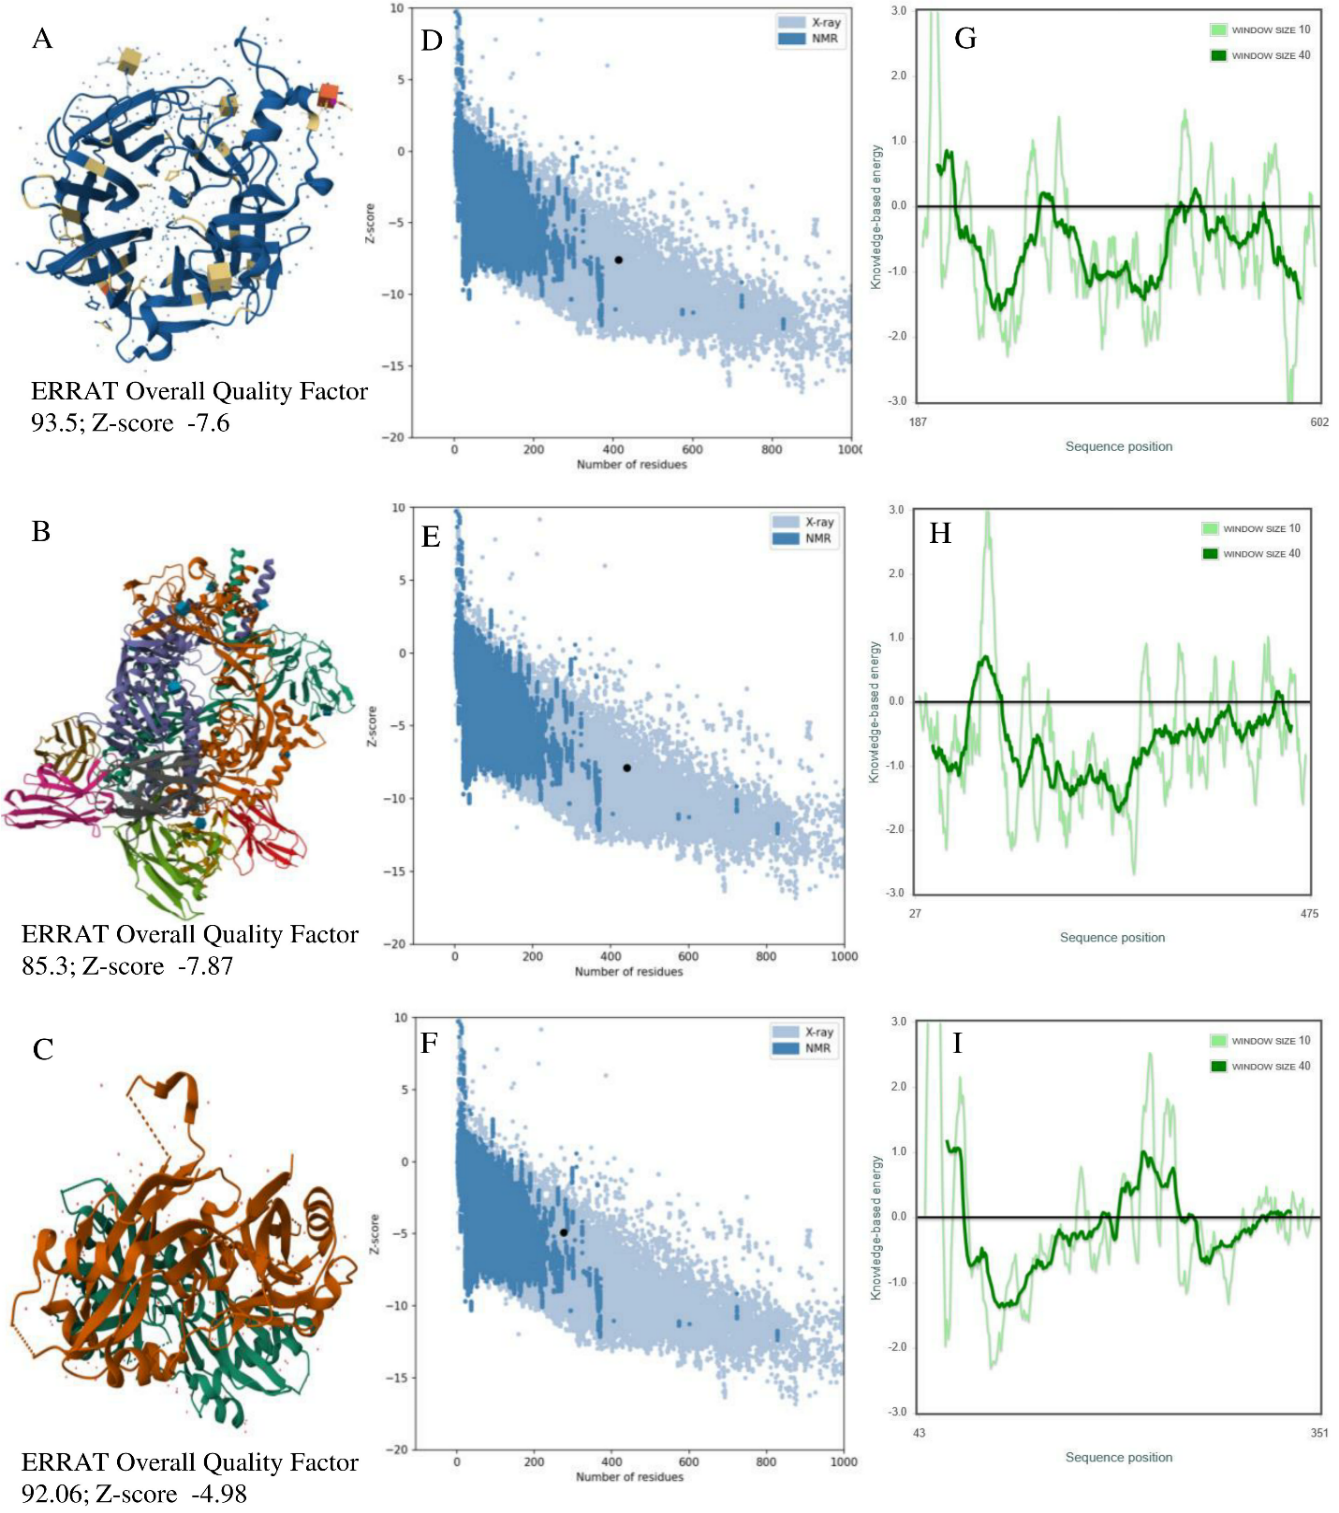


**Supplementary Figure 2.** Predited proteins structures and their stability bythe ERRAT2 and ProSA. The first column provided the predicted structures, and ERRAT overall quality scores, the second column provided the Z-scores and the third column provided the plot of residue scores. Part A, D, G for NiV-P, Part B, E, H for NiV-N, and Part C, F, I for NiV-W.


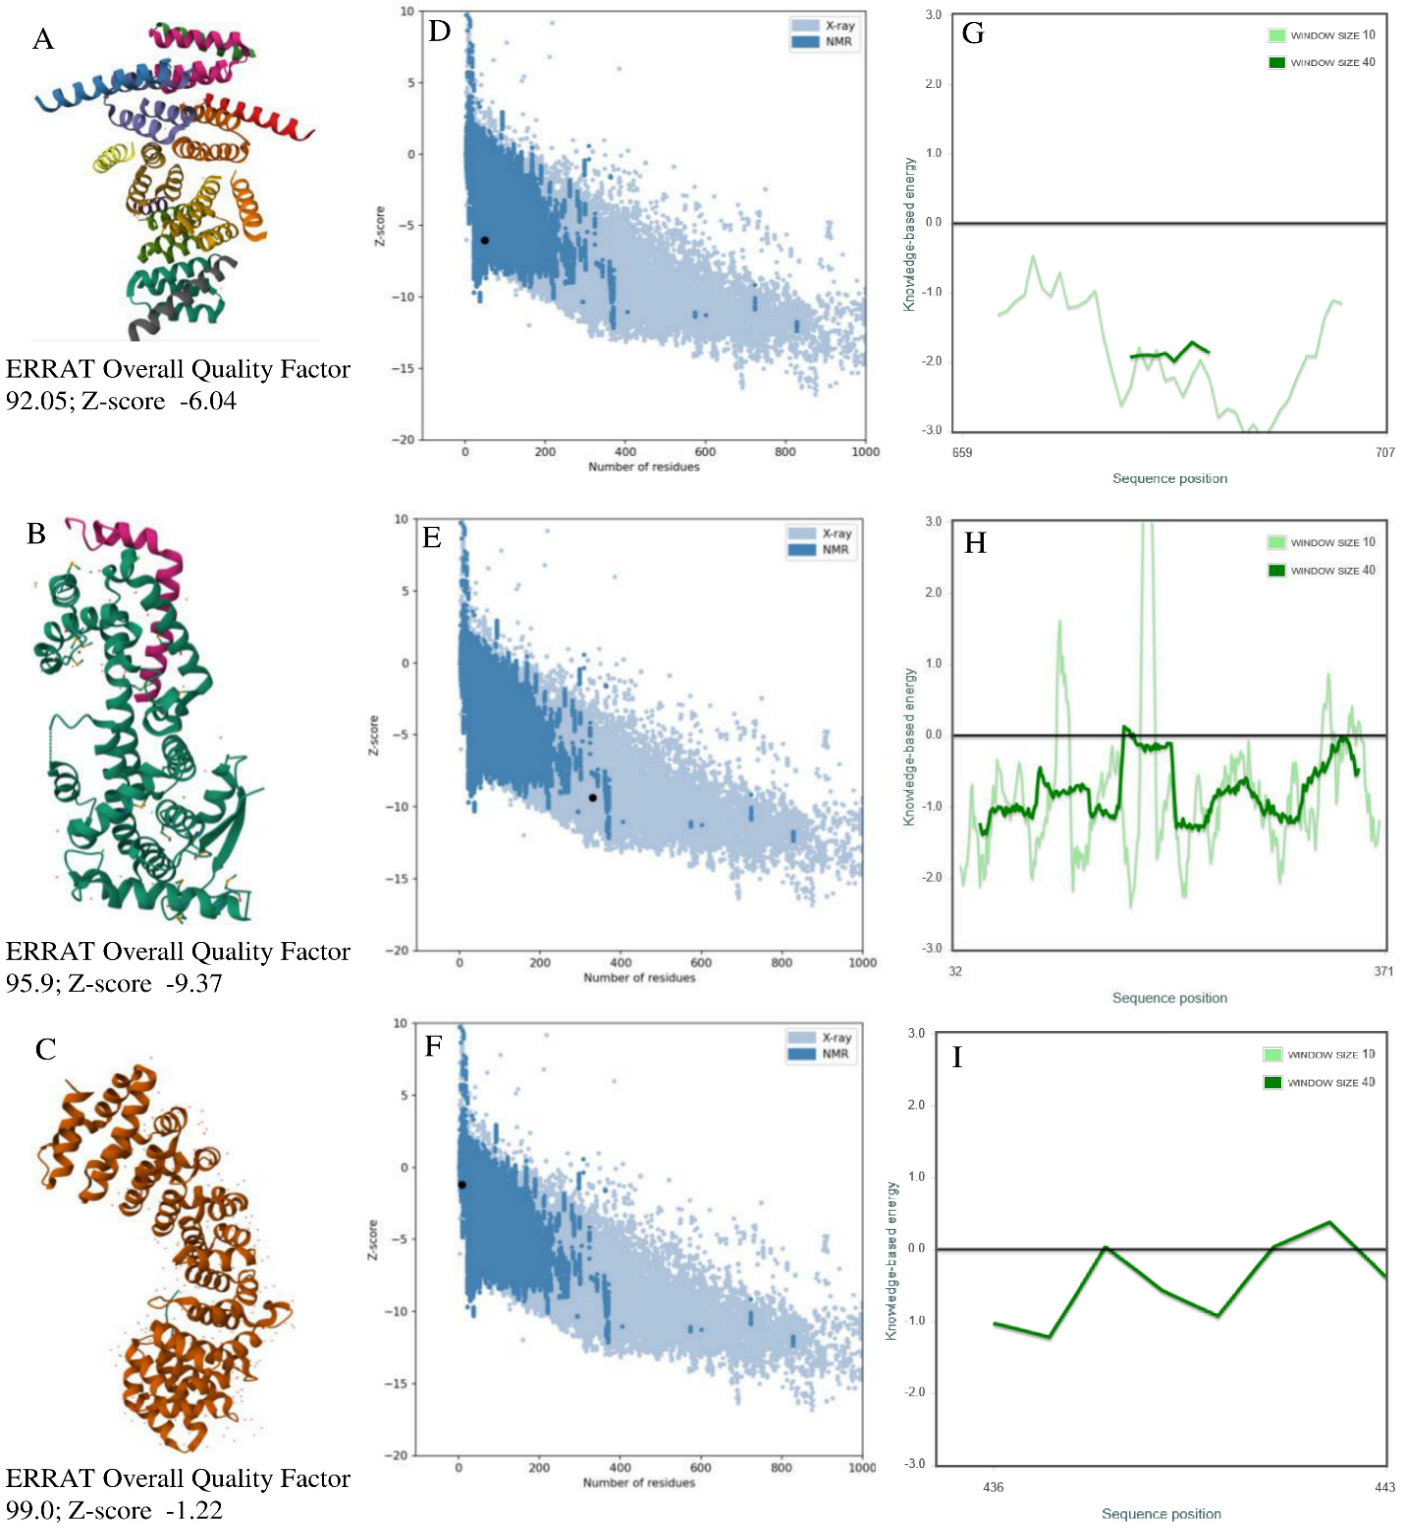


**Supplementary Figure 3.** Ramachandran plot for A. NiV-G, B. NiV-F, C. NiV-M, D. NiV-P, E. NiV-N, and F. NiV-W


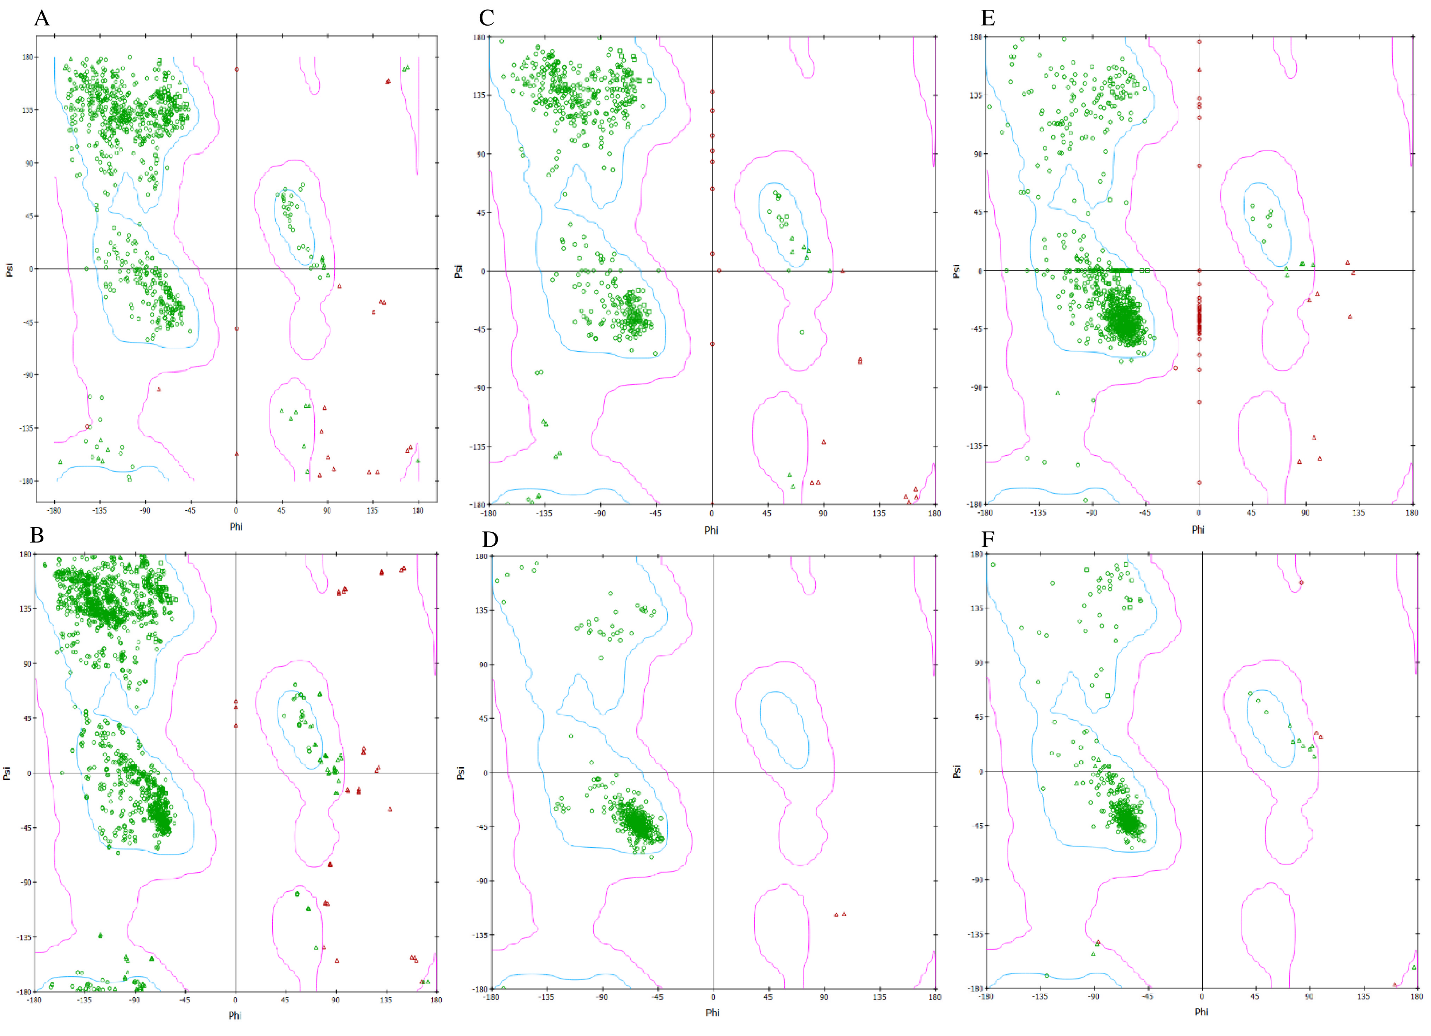


**Supplementary Figure 4.** Multi model superimposed simulated structure and MD simulation showing the RMSF profiles of NiV-G protein by CABS-flex.2 web server (<https://biocomp.chem.uw.edu.pl/CABSflex2>)


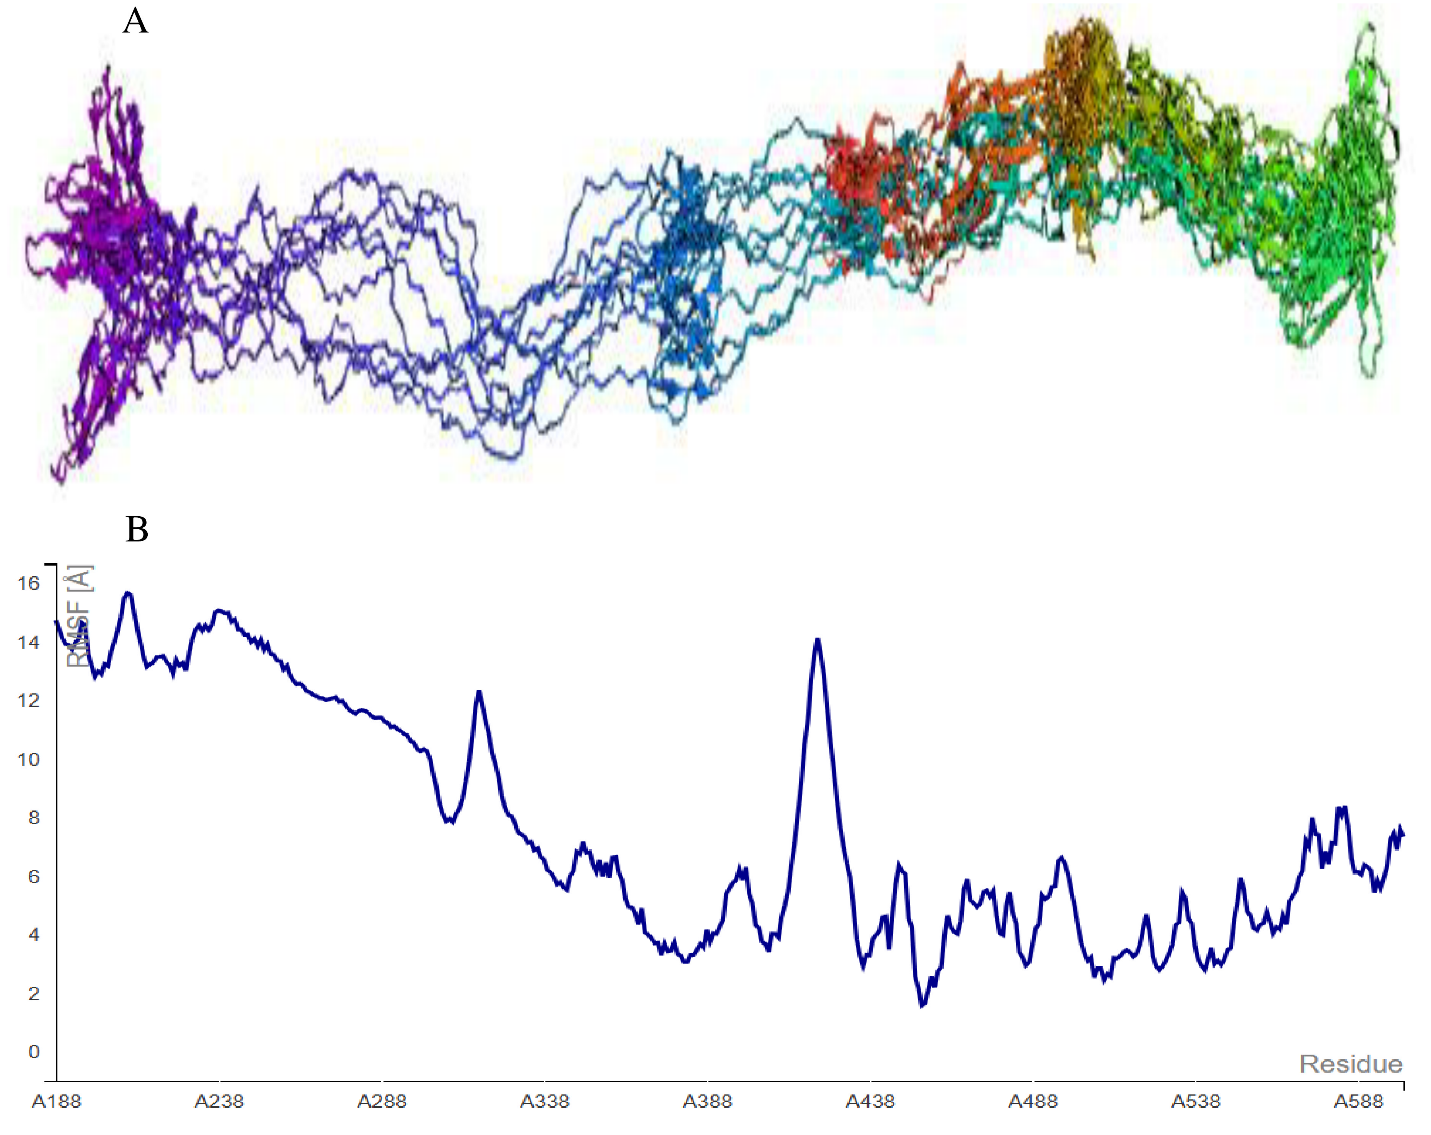


**Supplementary Figure 5.** Non-covalent interaction (NCI) analysis for Niv-G_FPVR docked complexes based on the reduced density gradient (RDG) using Multiwfn. FPVR: favipiravir. In the scatter plots, red color indicates the steric effect (repulsion) in regions with sign(λ 2 ) ρ >0; green color represents VDW (van der Waals) interactions in regions with sign (λ 2 with sign(λ 2 ) ρ ) ρ = 0; blue color in the regions < 0 displays hydrogen bonding.


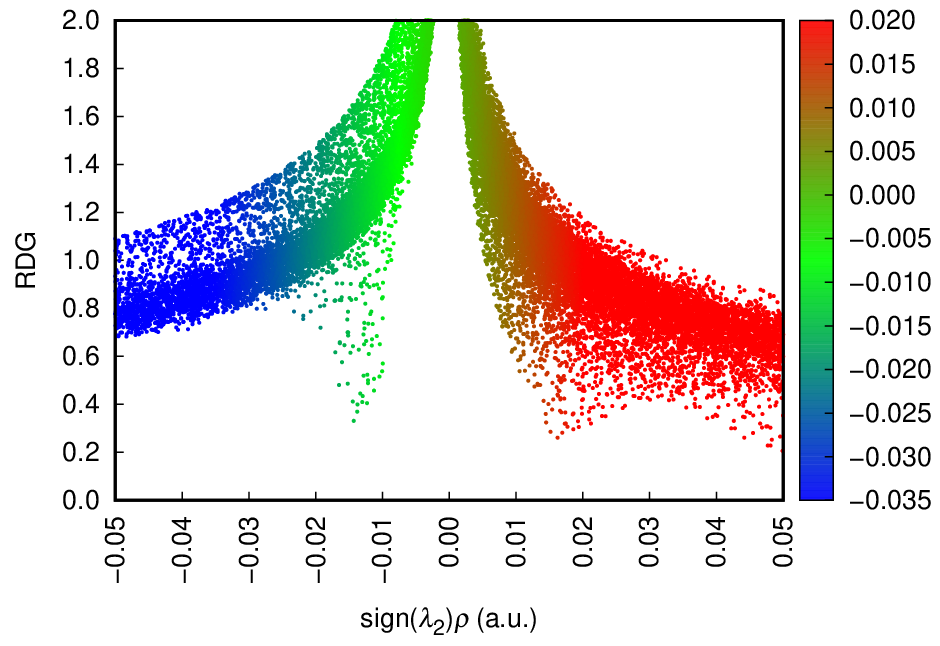

Supplement: Supplementary file 1 [file 4c46bfc710993a8a21bae3ee.docx]
